# Supplementary material
Source: PubMed Central journal article supplement (PMC5336153)
Supplement: 10.1074_M116.763342_jbc.M116.763342-1.pdf [file 10.1074_M116.763342_jbc.M116.763342-1.pdf]

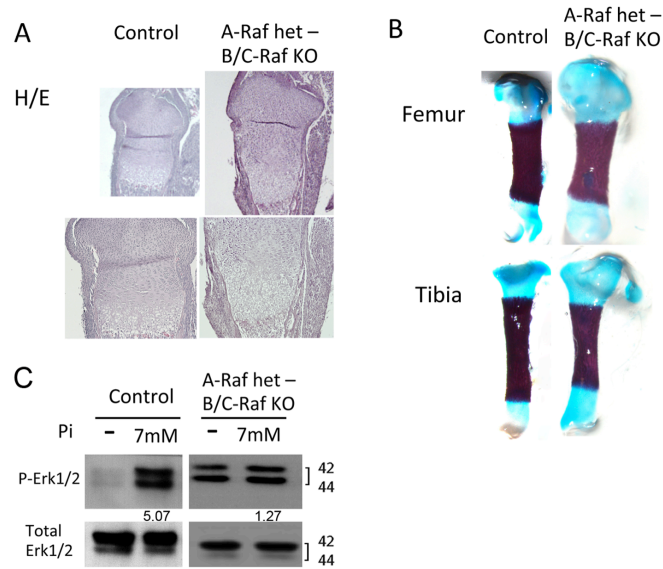

### Supplemental figure 1

(A) H&E staining of tibiae of E18.5 control and A-Raf<sup>+/+</sup>; B-Raf<sup>f/f;Col2Cre</sup>; C-Raf<sup>f/f;Col2Cre</sup> (A-Raf het - B/C-Raf KO) embryos. (B) Skeletal preparations of femurs and tibiae of control and A-Raf het - B/C-Raf KO embryos. (C) Western analysis of whole cell extracts for phosphorylated (P) and total Erk. Chondrocytes were incubated with 7mM sodium sulfate (-) or sodium phosphate (+) ion for 30 min prior to harvesting. Numbers represent the ratio of p-Erk signal in phosphate vs sulfate treated cells. Data are representative of three mice per genotype.
